# Supplementary material for: Synthesis and catalytic application of alumina@SAPO-11 composite via the in situ assembly of silicoaluminophosphate nanoclusters at an alumina substrate
Source: Royal Society of Chemistry journal article supplement (doi:10.1039/c8cy00537k), 2018-01-01
Supplement: c8cy00537k1.pdf [file c8cy00537k1.pdf]

Electronic Supplementary Material (ESI) for Catalysis Science & Technology

Supplementary Information for

**Synthesis and catalytic application of alumina@SAPO-11 composite *via* the *in situ* assembly of silicoaluminophosphate nanoclusters at an alumina substrate**

Ping Zhang,<sup>a</sup> Haiyan Liu,<sup>a</sup> Haibo Zhu,<sup>\*b</sup> S. Ted Oyama,<sup>b, c</sup> and Xiaojun Bao<sup>\*a</sup>

<sup>a</sup> State Key Laboratory of Heavy Oil Processing, China University of Petroleum, Beijing 102249, P. R. China.

E-mail: [baoxj@cup.edu.cn](mailto:baoxj@cup.edu.cn)

<sup>b</sup> National Engineering Research Center of Fertilizer Catalyst, College of Chemical Engineering, Fuzhou University, Fuzhou 350116, P. R. China. E-mail: [haibo.zhu@fzu.edu.cn](mailto:haibo.zhu@fzu.edu.cn)

<sup>c</sup> Department of Chemical Systems Engineering, University of Tokyo, 7-3-1 Hongo, Bunkyo-ku, Tokyo 113-8656, Japan

**Table of contents**

**1. Supplementary Figures and Tables**

**2. References**

## 1. Supplementary Figures and Tables

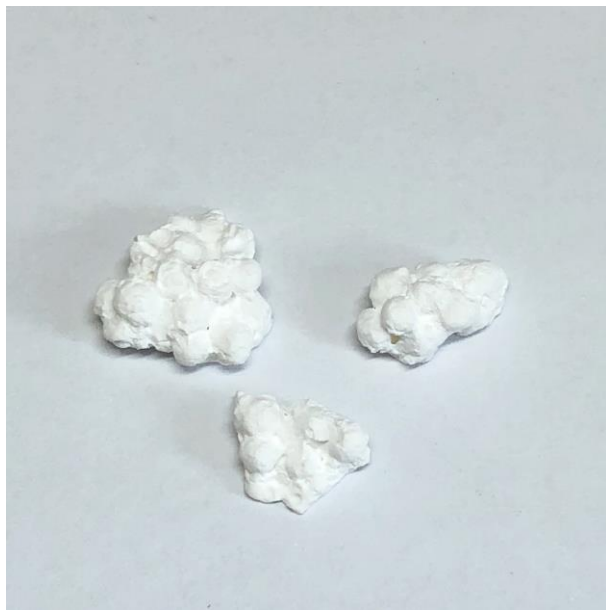

**Fig. S1** Photographs of the products synthesized following the procedure of alumina@SAPO-11 without adding CTAB.

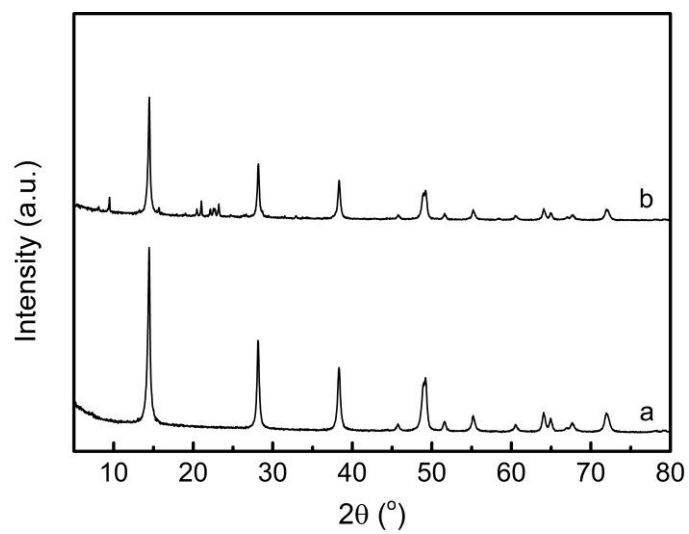

**Fig. S2** XRD patterns of the alumina substrate modified without  $\text{H}_3\text{PO}_4$  (a) and the product synthesized from alumina without  $\text{H}_3\text{PO}_4$  modification (b).

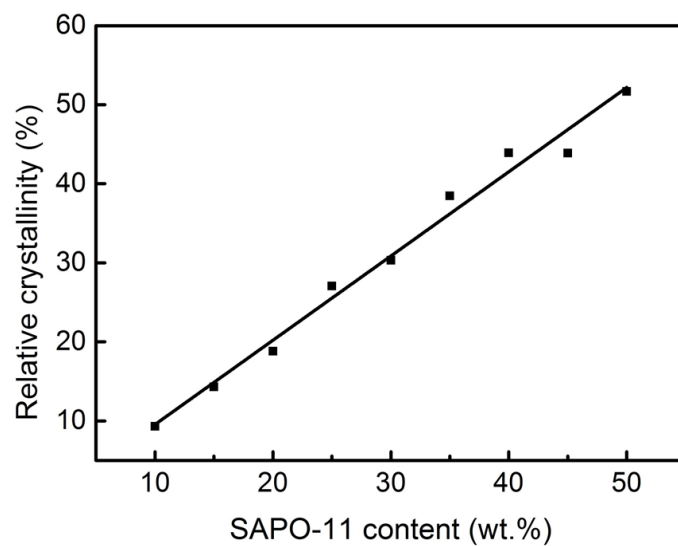

**Fig. S3** The relationship between the SAPO-11 content and the relative crystallinity. This curve was obtained by plotting the relative crystallinity of SAPO-11 versus the mass fraction of SAPO-11 in a series of mechanical mixtures of pure SAPO-11 and  $H_3PO_4$  modified alumina.

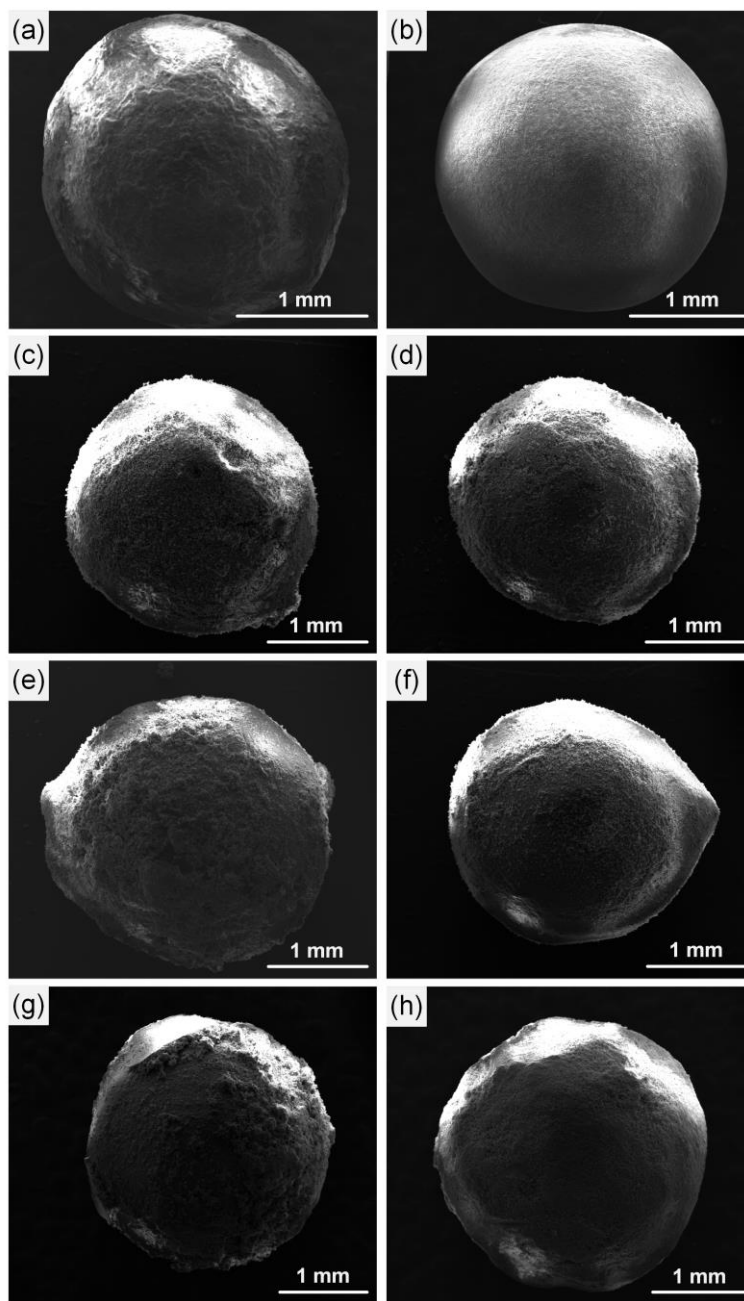

**Fig. S4** SEM images of the top-view of the alumina substrate (a), the  $\text{H}_3\text{PO}_4$  modified alumina substrate (b), and the alumina@SAPO-11 composite (c-h). *Note: In order to check the homogeneity of the alumina@SAPO-11 composite, several particles were randomly selected for taking the SEM images one by one as shown in c-h.*

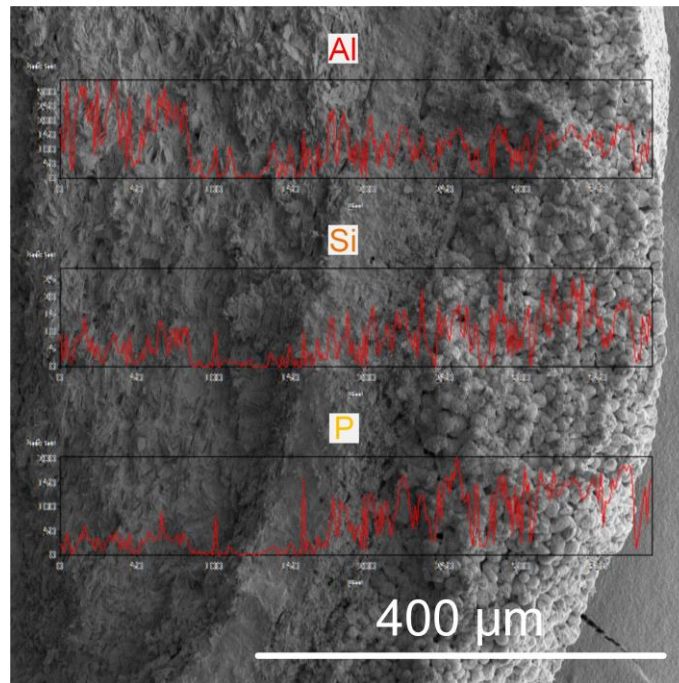

**Fig. S5** Line scan analysis for SEM image of the alumina@SAPO-11 composite: Al (red), Si (orange) and P (yellow).

**Table S1.** Chemical compositions of alumina substrate before/after H<sub>3</sub>PO<sub>4</sub> modification.

| Sample                                          | Al content <sup>a</sup><br>% | P content <sup>a</sup><br>% | Al/P <sup>b</sup><br>mol/mol |
|-------------------------------------------------|------------------------------|-----------------------------|------------------------------|
| Alumina                                         | 52.7                         | -                           | ∞                            |
| H <sub>3</sub> PO <sub>4</sub> modified alumina | 48.1                         | 3.8                         | 16.6                         |

Notes: <sup>a</sup> Determined by ICP-OES; <sup>b</sup> Determined by XRF.

**Table S2.** Textural properties of SAPO-11<sub>reference</sub>, alumina@SAPO-11 and alumina-SAPO-11.

| Sample                       | $S_{\text{BET}}^{\text{a}}$<br>(m <sup>2</sup> /g) | $S_{\text{micro}}^{\text{b}}$<br>(cm <sup>2</sup> /g) | $S_{\text{ext}}$<br>(m <sup>2</sup> /g) | $V_{\text{micro}}^{\text{b}}$<br>(cm <sup>3</sup> /g) | $V_{\text{meso}}^{\text{c}}$<br>(cm <sup>3</sup> /g) |
|------------------------------|----------------------------------------------------|-------------------------------------------------------|-----------------------------------------|-------------------------------------------------------|------------------------------------------------------|
| SAPO-11 <sub>reference</sub> | 154                                                | 112                                                   | 42                                      | 0.05                                                  | 0.10                                                 |
| alumina@SAPO-11              | 166                                                | 41                                                    | 125                                     | 0.02                                                  | 0.23                                                 |
| alumina-SAPO-11              | 120                                                | 41                                                    | 79                                      | 0.02                                                  | 0.22                                                 |

Notes: <sup>a</sup> BET method; <sup>b</sup> *t*-plot method; <sup>c</sup> BJH method (adsorption branch).



**Table S3.** Product distributions of *n*-octane over Pt/alumina@SAPO-11 and Pt/alumina-SAPO-11.<sup>a</sup>

|                             | Pt/alumina@SAPO-11 | Pt/alumina-SAPO-11 |
|-----------------------------|--------------------|--------------------|
| Conversion (%)              | 66.9               | 45.9               |
| Product composition $w_i^b$ |                    |                    |
| 2-MC <sub>7</sub>           | 35.4               | 41.6               |
| 3-MC <sub>7</sub>           | 38.8               | 37.6               |
| 4-MC <sub>7</sub>           | 10.2               | 8.5                |
| 2,5-DMC <sub>6</sub>        | 5.0                | 3.4                |
| 2,4-DMC <sub>6</sub>        | 4.1                | 2.4                |
| 2,3-DMC <sub>6</sub>        | 2.4                | 1.2                |
| 2,2-DMC <sub>6</sub>        | 0.9                | 0.1                |
| <i>i</i> -C <sub>5</sub>    | 1.8                | 2.6                |
| <i>n</i> -C <sub>5</sub>    | 1.1                | 1.9                |
| 2-MC <sub>5</sub>           | 0.1                | 0.0                |
| 3-MC <sub>5</sub>           | 0.0                | 0.0                |
| <i>n</i> -C <sub>6</sub>    | 0.0                | 0.1                |
| 2-MC <sub>6</sub>           | 0.1                | 0.2                |
| 3-MC <sub>6</sub>           | 0.1                | 0.2                |
| <i>n</i> -C <sub>7</sub>    | 0.0                | 0.2                |
| Total                       | 100.0              | 100.0              |

Notes: <sup>a</sup> Reaction conditions: Tests were conducted in a continuous flow tubular fixed-bed micro-reactor,  $W_{\text{cat}} = 5$  g, 1.5 MPa, 360 °C, H<sub>2</sub>/*n*-octane volumetric ratio 300, weight hourly space velocity 1.5 h<sup>-1</sup>; <sup>b</sup>  $w_i$  is the mass fraction of component *i* in the liquid product.

**Table S4.** Results of *n*-octane hydroisomerization over Pt/alumina@SAPO-11 and Pt/alumina-SAPO-11 at the same level of conversion of 41%.<sup>a</sup>

|                  | Pt/alumina@SAPO-11 | Pt/alumina-SAPO-11 |
|------------------|--------------------|--------------------|
| Selectivity (%)  |                    |                    |
| $S_{MB}^b$       | 85.5               | 85.7               |
| $S_{DB}^b$       | 8.2                | 6.1                |
| $S_C^b$          | 6.3                | 8.2                |
| $S_{DB}/S_C$     | 1.3                | 0.7                |
| MON <sup>c</sup> | 34.7               | 33.3               |
| RON <sup>c</sup> | 28.9               | 27.9               |

Notes: <sup>a</sup> Reaction conditions: Tests were conducted in a continuous flow tubular fixed-bed micro-reactor,  $W_{cat} = 5$  g, 1.5 MPa, 360 °C,  $H_2/n$ -octane volumetric ratio 300, weight hourly space velocity 4.0 and  $2.0\text{ h}^{-1}$ , respectively; <sup>b</sup>  $S_{MB}$ ,  $S_{DB}$  and  $S_C$  correspond to the total selectivity to mono-branched  $C_8$  isomers, total selectivity to di-branched  $C_8$  isomers, and total selectivity to cracking products, respectively, at 41% conversion of *n*-octane; <sup>c</sup> MON (motor octane number) and RON (research octane number) are calculated according to the following formula: octane number =  $\sum(a_i w_i)$ , in which  $a_i$  is the octane number of component  $i$  and  $w_i$  is the mass fraction of component  $i$ ;<sup>1</sup> and the RON and MON data for each component in the liquid product are adapted from *Technical Data Book-Petroleum Refining* by API (American Petroleum Institute).

**Table S5.** Product distributions of *n*-octane over Pt/alumina@SAPO-11 and Pt/alumina-SAPO-11.<sup>a</sup>

|                             | Pt/alumina@SAPO-11 | Pt/alumina-SAPO-11 |
|-----------------------------|--------------------|--------------------|
| Conversion (%)              | 41.3               | 41.6               |
| Product composition $w_i^b$ |                    |                    |
| 2-MC <sub>7</sub>           | 38.1               | 41.7               |
| 3-MC <sub>7</sub>           | 39.6               | 39.1               |
| 4-MC <sub>7</sub>           | 11.1               | 8.0                |
| 2,5-DMC <sub>6</sub>        | 2.8                | 3.0                |
| 2,4-DMC <sub>6</sub>        | 2.9                | 1.8                |
| 2,3-DMC <sub>6</sub>        | 1.8                | 1.1                |
| 2,2-DMC <sub>6</sub>        | 1.1                | 0.1                |
| <i>i</i> -C <sub>5</sub>    | 1.4                | 1.6                |
| <i>n</i> -C <sub>5</sub>    | 0.9                | 2.1                |
| 2-MC <sub>5</sub>           | 0.1                | 0.1                |
| 3-MC <sub>5</sub>           | 0.1                | 0.0                |
| <i>n</i> -C <sub>6</sub>    | 0.0                | 0.1                |
| 2-MC <sub>6</sub>           | 0.0                | 0.9                |
| 3-MC <sub>6</sub>           | 0.1                | 0.2                |
| <i>n</i> -C <sub>7</sub>    | 0.0                | 0.2                |
| Total                       | 100.0              | 100.0              |

Notes: <sup>a</sup> Reaction conditions: Tests were conducted in a continuous flow tubular fixed-bed micro-reactor,  $W_{\text{cat}} = 5$  g, 1.5 MPa, 360 °C, H<sub>2</sub>/*n*-octane volumetric ratio 300, weight hourly space velocity 4.0 and 2.0 h<sup>-1</sup>, respectively; <sup>b</sup>  $w_i$  is the mass fraction of component *i* in the liquid product.

**Table S6.** Acidity properties of Pt/alumina@SAPO-11 and Pt/alumina-SAPO-11 determined by Py-IR.

| Sample             | Amount ( $\mu\text{mol/g}$ ) and distribution of acid sites |      |       |                                       |      |       |
|--------------------|-------------------------------------------------------------|------|-------|---------------------------------------|------|-------|
|                    | Total acid sites (200 °C)                                   |      |       | Medium and strong acid sites (350 °C) |      |       |
|                    | B                                                           | L    | B + L | B                                     | L    | B + L |
| Pt/alumina@SAPO-11 | 18.3                                                        | 66.0 | 84.3  | 10.2                                  | 23.2 | 33.4  |
| Pt/alumina-SAPO-11 | 11.0                                                        | 70.4 | 81.4  | 5.7                                   | 29.3 | 35.0  |

## 2. References

- 1 R. Sun, S. Shen, D. Zhang, Y. Ren and J. Fan, *Energy Fuels*, 2015, **29**, 7005-7013.
